# Supplementary material
Source: HighWire-hosted journal article supplement (https://cmaj.ca/highwire/filestream/59848/field_highwire_adjunct_files/4/151469-res-Appendix_5.pdf)
Supplement: 151469-res-Appendix_5.pdf [file 151469-res-Appendix_5.pdf]

**Appendix 5 (as supplied by the authors):** Internal Validation: Consistency of Variable Selection in 500 Bootstrap Subsamples

| <b>Variable</b>                                                                                                                                                                                                                                                                                                                                                                                                                                                                                                                                                                                                     | <b>Percent Selected (%)</b> |
|---------------------------------------------------------------------------------------------------------------------------------------------------------------------------------------------------------------------------------------------------------------------------------------------------------------------------------------------------------------------------------------------------------------------------------------------------------------------------------------------------------------------------------------------------------------------------------------------------------------------|-----------------------------|
| <b>ED diagnosis of cardiac or vasovagal syncope</b>                                                                                                                                                                                                                                                                                                                                                                                                                                                                                                                                                                 | <b>100.0</b>                |
| <b>Troponin elevated (&gt; 99%ile normal population)</b>                                                                                                                                                                                                                                                                                                                                                                                                                                                                                                                                                            | <b>99.2</b>                 |
| <b>Corrected QT interval &gt;480 milliseconds</b>                                                                                                                                                                                                                                                                                                                                                                                                                                                                                                                                                                   | <b>97.4</b>                 |
| <b>Triage or ED systolic BP &lt;90 or &gt;180 mmHg</b>                                                                                                                                                                                                                                                                                                                                                                                                                                                                                                                                                              | <b>93.8</b>                 |
| <b>QRS duration &gt;130 milliseconds</b>                                                                                                                                                                                                                                                                                                                                                                                                                                                                                                                                                                            | <b>82.4</b>                 |
| <b>History of heart disease*</b>                                                                                                                                                                                                                                                                                                                                                                                                                                                                                                                                                                                    | <b>73.8</b>                 |
| <b>Abnormal QRS axis (&lt;-30 or &gt;110)</b>                                                                                                                                                                                                                                                                                                                                                                                                                                                                                                                                                                       | <b>57.4</b>                 |
| <b>Predisposition to vasovagal symptoms<sup>†</sup></b>                                                                                                                                                                                                                                                                                                                                                                                                                                                                                                                                                             | <b>57.2</b>                 |
| Triage respiratory rate >20/minute                                                                                                                                                                                                                                                                                                                                                                                                                                                                                                                                                                                  | 45.4                        |
| Highest ED diastolic BP >110 mmHg                                                                                                                                                                                                                                                                                                                                                                                                                                                                                                                                                                                   | 44.2                        |
| Hematocrit <0.3                                                                                                                                                                                                                                                                                                                                                                                                                                                                                                                                                                                                     | 18.0                        |
| Highest ED heart rate >110 beats/min                                                                                                                                                                                                                                                                                                                                                                                                                                                                                                                                                                                | 15.6                        |
| Female sex                                                                                                                                                                                                                                                                                                                                                                                                                                                                                                                                                                                                          | 14.6                        |
| Left bundle branch block                                                                                                                                                                                                                                                                                                                                                                                                                                                                                                                                                                                            | 11.6                        |
| Creatinine >150 µmol/L                                                                                                                                                                                                                                                                                                                                                                                                                                                                                                                                                                                              | 11.6                        |
| Urea >12 mmol/L                                                                                                                                                                                                                                                                                                                                                                                                                                                                                                                                                                                                     | 11.0                        |
| Lowest ED diastolic BP <50 mmHg                                                                                                                                                                                                                                                                                                                                                                                                                                                                                                                                                                                     | 10.4                        |
| Age >75 years                                                                                                                                                                                                                                                                                                                                                                                                                                                                                                                                                                                                       | 9.6                         |
| Prodrome <sup>□</sup>                                                                                                                                                                                                                                                                                                                                                                                                                                                                                                                                                                                               | 8.0                         |
| History of vascular disease <sup>§</sup>                                                                                                                                                                                                                                                                                                                                                                                                                                                                                                                                                                            | 7.8                         |
| Left ventricular hypertrophy                                                                                                                                                                                                                                                                                                                                                                                                                                                                                                                                                                                        | 6.8                         |
| <p>ED = Emergency Department<br/> *Includes history of coronary or valvular heart disease, cardiomyopathy, congestive heart failure or non-sinus rhythm (ECG evidence during the index visit or documented history of ventricular or atrial arrhythmias, or device implantation)<br/> <sup>†</sup>Warm-crowded place, prolonged standing, fear, emotion or pain<br/> <sup>‡</sup>Includes patients with<br/> <sup>§</sup>Medical history of transient ischemic attack, cerebrovascular accident or peripheral vascular disease<br/> <sup>□</sup>Dizziness, light-headedness, vision changes, nausea or vomiting</p> |                             |
